# Supplementary material for: Anisotropic mesoporous silica/microgel core–shell responsive particles
Source: Royal Society of Chemistry journal article supplement (doi:10.1039/d0ra02278k), 2020-01-01
Supplement: d0ra02278k1.pdf [file d0ra02278k1.pdf]

## Supplementary information

# Anisotropic Mesoporous Silica/Microgel Core-Shell Responsive Particles

Julien Schmitt<sup>a,b</sup>, Caroline Hartwig<sup>a</sup>, Jérôme J. Crassous<sup>a,c</sup>, Adriana M. Mihut<sup>a</sup>, Peter Schurtenberger<sup>a,d</sup>  
and Viveka Alfredsson<sup>a</sup>

<sup>a</sup> Division of Physical Chemistry, Department of Chemistry, Lund University, 221 00 Lund, Sweden.

<sup>b</sup>LSFC Laboratoire de Synthèse et Fonctionnalisation des Céramiques UMR 3080 CNRS / Saint-Gobain CREE, Saint-Gobain Research Provence, 550 avenue Alphonse Jauffret, Cavaillon, France

<sup>c</sup> Institute of Physical Chemistry, RWTH Aachen University, 52074 Aachen, Germany.

<sup>d</sup> Lund Institute of advanced Neutron and X-ray Science (LINXS), Lund University, Lund, Sweden.

**Figure S1:** SEM micrographs of silica (a) platelets, (b) primary particles and (c) rods from powder deposition on the stub

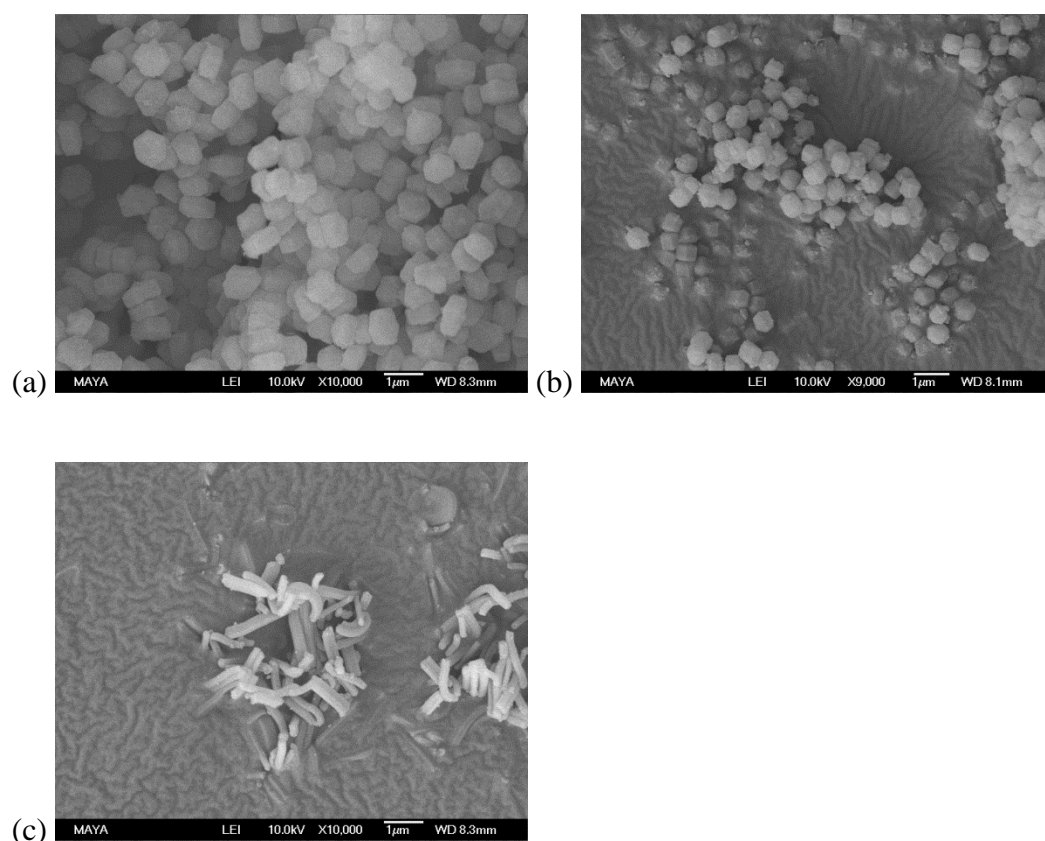

**Figure S2:** SEM micrographs of hybrid silica/PNIPAM (a) platelets, (b) primary particles and (c) rods from droplet deposition of a 0.2wt% suspension on a glass coverslip then deposited on the stub. The black arrows highlight the PNIPAM bridges between particles

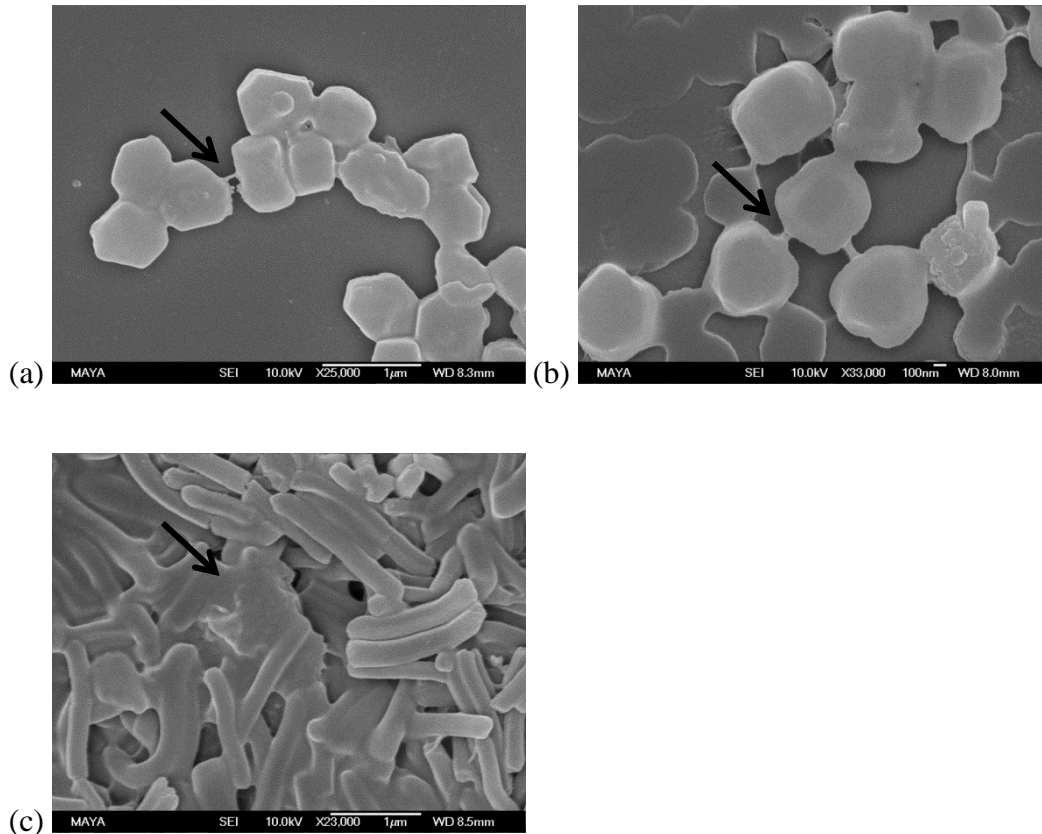

**Figure S3:** SEM micrographs of hybrid silica/PNIPAM (a) platelets, (b) primary particles and (c) rods obtained after spin-coating of suspensions of particles at 0.01 wt% on a glass surface.

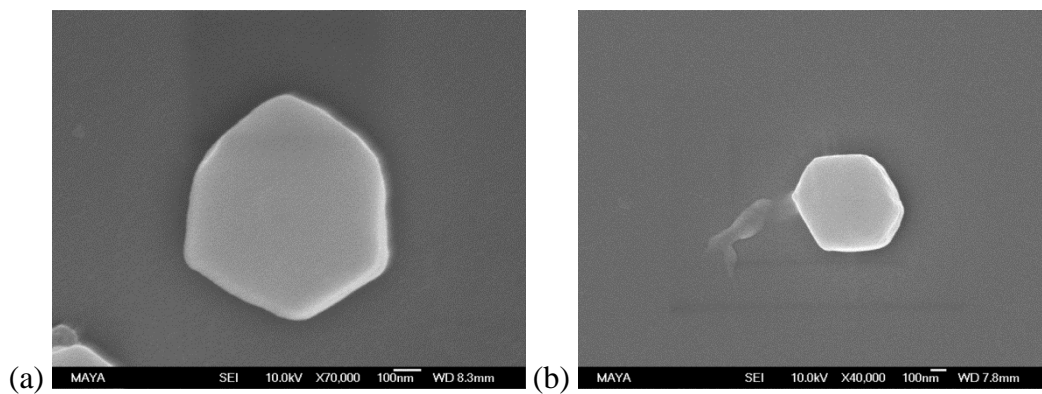

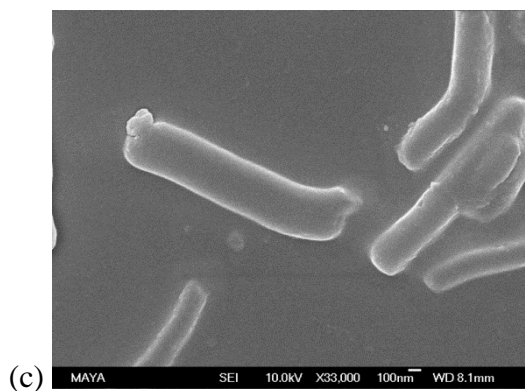

Figure S4: Cryo-TEM micrographs of hybrid silica/PNIPAM (a and b) platelets, (c and d) primary particles and (e and f) rods from dispersions at 0.2 wt% at 20°C.

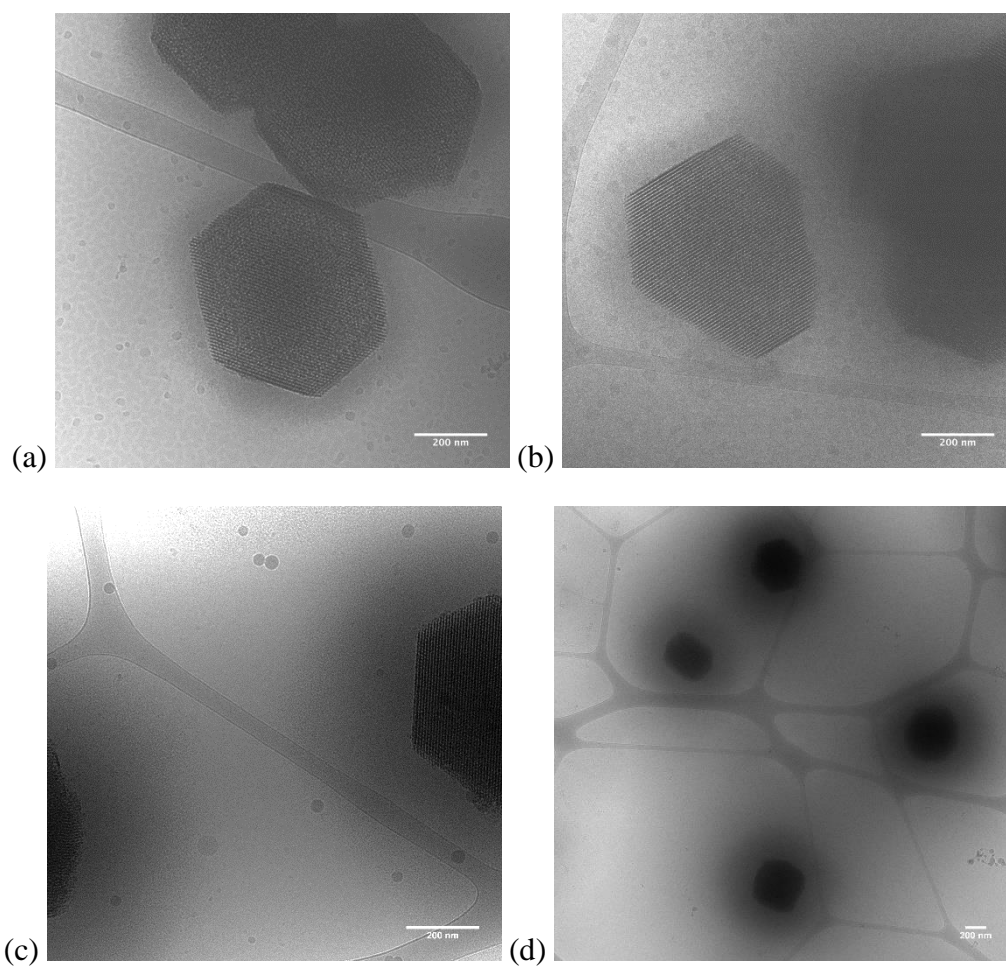

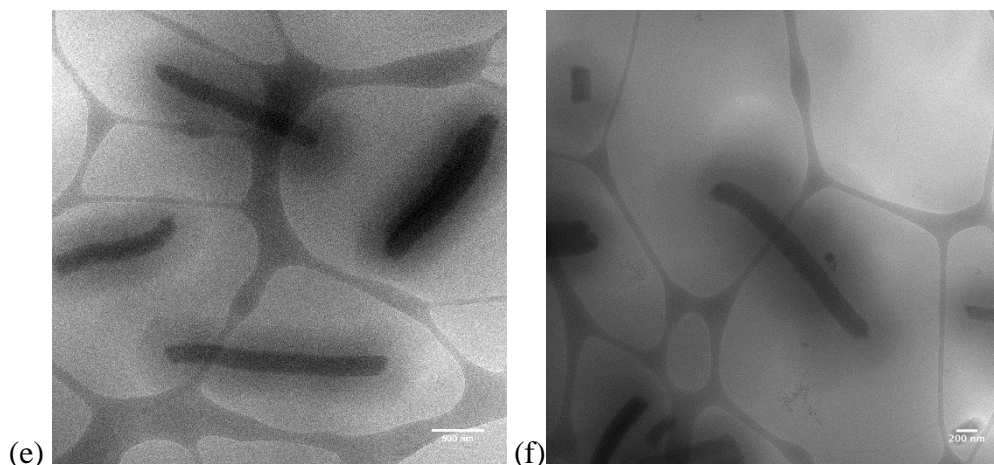

**Figure S5:** Plot of  $\Gamma$  versus  $q^2$ , with  $\Gamma$  extracted using the second order cumulant analysis of the correlation function  $g^I(\tau)$ , obtained from DLS measurements at  $50^\circ$  ( $q=11.18 \mu\text{m}^{-1}$ ),  $90^\circ$  ( $q=18.70 \mu\text{m}^{-1}$ ) and  $110^\circ$  ( $q=21.67 \mu\text{m}^{-1}$ ) for hybrid silica/PNIPAM rods at  $18^\circ\text{C}$ . The fit in blue gives the translational diffusion coefficient  $D_t$  ( $\mu\text{m}^2.\text{s}^{-1}$ ) ( $\Gamma = D_t q^2$ )

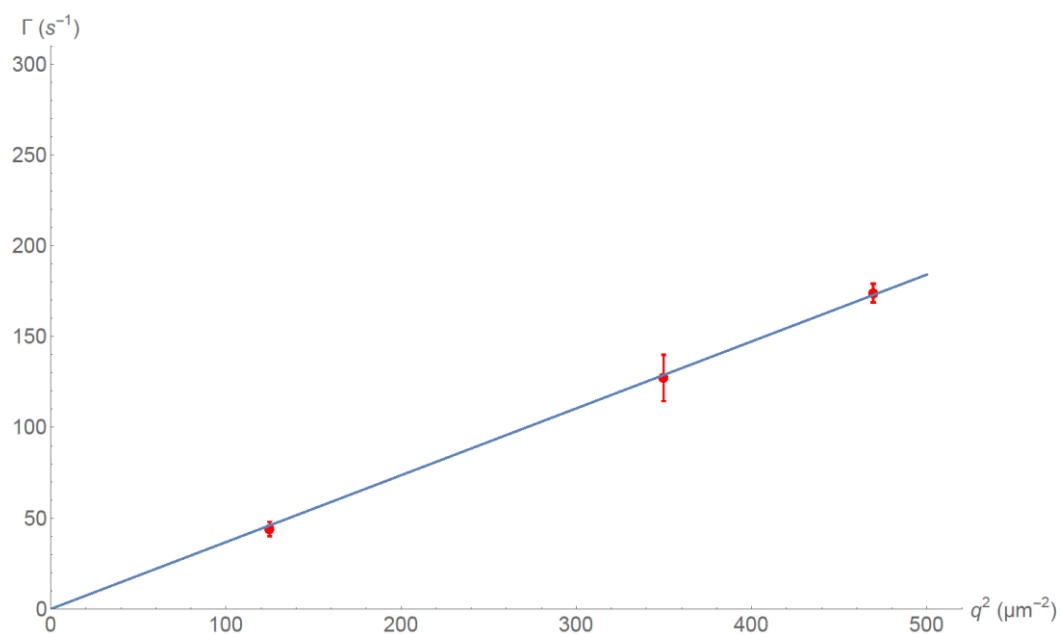

**Video S1:** CLSM video of a suspension made of hybrid core-shell silica/PNIPAM rods at 2wt% and  $25^\circ\text{C}$  without electric field

**Video S2:** CLSM video of a suspension made of hybrid core-shell silica/PNIPAM rods at 2wt% and  $25^\circ\text{C}$  under an alternate electric field, with a field strength  $E=50 \text{ kV/m}$  and

frequency  $f=160$  kHz. The rods are aligned along the direction of the field, along the imaging plane.
